1 **Biodistribution and Environmental Safety of a Live-attenuated YF17D-vectored**  
2 **SARS-CoV-2 Vaccine Candidate**

3 Li-Hsin Li <sup>1</sup>, Laurens Liesenborghs <sup>1,6#</sup>, Lanjiao Wang <sup>2#</sup>, Marleen Lox <sup>3</sup>, Michael  
4 Bright Yakass <sup>1,4</sup>, Sander Jansen <sup>1</sup>, Ana Lucia Rosales Rosas <sup>2</sup>, Xin Zhang <sup>1</sup>, Hendrik  
5 Jan Thibaut <sup>5</sup>, Dirk Teuwen <sup>1</sup>, Johan Neyts <sup>1</sup>, Leen Delang <sup>2</sup>, and Kai Dallmeier <sup>1\*</sup>

6 <sup>1</sup> Department of Microbiology, Immunology and Transplantation, Rega Institute,  
7 Virology and Chemotherapy, Molecular Vaccinology and Vaccine Discovery, KU  
8 Leuven, Leuven, Belgium.

9 <sup>2</sup> Department of Microbiology, Immunology and Transplantation, Rega Institute,  
10 Virology and Chemotherapy, Mosquito Virology Team, KU Leuven, Leuven, Belgium.

11 <sup>3</sup> Department of Cardiovascular Diseases, Centre for Molecular and Vascular  
12 Biology, KU Leuven, Leuven, Belgium.

13 <sup>4</sup> West African Centre for Cell Biology of Infectious Pathogens (WACCBIP),  
14 Department of Biochemistry, Cell and Molecular Biology, University of Ghana, Accra,  
15 Ghana.

16 <sup>5</sup> Department of Microbiology, Immunology and Transplantation, Rega Institute,  
17 Translational Platform Virology and Chemotherapy (TPVC), KU Leuven, Leuven,  
18 Belgium.

19 <sup>6</sup> The Outbreak Research Team, Department of Clinical Sciences, Institute of  
20 Tropical Medicine, Antwerp, Belgium.

21

22

23 # equal contribution

24 \* address correspondence to [kai.dallmeier@kuleuven.be](mailto:kai.dallmeier@kuleuven.be)

25

26 **ABSTRACT**

27 New platforms are urgently needed for the design of novel prophylactic vaccines and  
28 advanced immune therapies. Live-attenuated yellow fever vaccine YF17D serves as  
29 vector for several licensed vaccines and platform for novel vaccine candidates. Based  
30 on YF17D, we developed YF-S0 as exceptionally potent COVID-19 vaccine candidate.  
31 However, use of such live RNA virus vaccines raises safety concerns, *i.e.*, adverse  
32 events linked to original YF17D (yellow fever vaccine-associated neurotropic; YEL-  
33 AND, and viscerotropic disease; YEL-AVD). In this study, we investigated the  
34 biodistribution and shedding of YF-S0 in hamsters. Likewise, we introduced hamsters  
35 deficient in STAT2 signaling as new preclinical model of YEL-AND/AVD. Compared to  
36 parental YF17D, YF-S0 showed an improved safety with limited dissemination to brain  
37 and visceral tissues, absent or low viremia, and no shedding of infectious virus.  
38 Considering yellow fever virus is transmitted by *Aedes* mosquitoes, any inadvertent  
39 exposure to the live recombinant vector via mosquito bites is to be excluded. The  
40 transmission risk of YF-S0 was hence evaluated in comparison to readily transmitting  
41 YFV-Asibi strain and non-transmitting YF17D vaccine, with no evidence for productive  
42 infection of vector mosquitoes. The overall favorable safety profile of YF-S0 is  
43 expected to translate to other novel vaccines that are based on the same YF17D  
44 platform.

45

## 46 INTRODUCTION

47 Roughly two years after first emergence in 2019/2020, more than 5 million people have  
48 succumbed to Coronavirus Disease 2019 (COVID-19) caused by Severe Acute  
49 Respiratory Syndrome Coronavirus 2 (SARS-CoV-2)  
50 (<https://coronavirus.jhu.edu/map.html>). Mass immunization is key to mitigating the  
51 expanding pandemic [1]. A set of rapidly developed prophylactic vaccines plays a  
52 crucial role in global immunization against SARS-CoV-2. Several of these vaccines are  
53 first-in-class based on novel platforms, including game changer mRNA vaccines and  
54 viral vector vaccines that are unprecedented in both, their high clinical efficacy as well  
55 as the incremental advance in breakthrough innovation [2-4]. However, a global  
56 vaccine supply shortage, the dependence on an ultra-cold chain system in case of  
57 mRNA vaccines, and the continuous emergence of virus variants pose unmet  
58 challenges [5, 6]. Unfortunately, long-term effectiveness of current SARS-CoV-2  
59 vaccines is waning due to the combined effect of (i) a rapid decay of virus-neutralizing  
60 antibodies (nAb) over time and (ii) emergence of new variants escaping vaccine-  
61 induced immunity [7-9]. Furthermore, several first-generation COVID-19 vaccines  
62 have a rather high reactogenicity. With the growing number of vaccinated people, more  
63 cases and a wider spectrum of adverse effects following immunization (AEFI),  
64 including severe adverse effects (SAE) such a myocarditis or life-threatening deep-  
65 venous thrombosis are described [10-15]. In summary, there is an urgent to develop  
66 new and improved second-generation COVID-19 vaccines to quench the pandemic.

67 Recently, we used an alternative vaccine platform that uses the fully replication  
68 competent live-attenuated yellow fever vaccine YF17D as vector [16] and developed  
69 a virus-vectored SARS-CoV-2 vaccine candidate (YF-S0) that expresses a stabilized  
70 prefusion form of SARS-CoV-2 spike protein (S0) [17]. YF-S0 was shown to induce  
71 vigorous humoral and cellular immune responses in hamsters (*Mesocricetus auratus*),  
72 mice (*Mus musculus*) and cynomolgus macaques (*Macaca fascicularis*) and was able  
73 to prevent COVID19-like disease after single-dose vaccination in a stringent hamster  
74 model. Due to its YF17D backbone, YF-S0 could serve as dual vaccine to also prevent  
75 yellow fever virus (YFV) infections, which should provide an added benefit for  
76 populations living in regions at risk of YFV outbreaks [18].

77 In addition to preclinical efficacy, development of such a new vaccine requires in-depth  
78 evaluations of its safety to support progression from preclinical study to clinical trials.  
79 In particular for live-attenuated viral vaccines such as YF-S0, the biodistribution of the  
80 vaccine virus after administration needs to be assessed [19] to understand the viral  
81 organ tropism and hence to exclude potential direct harm to specific tissues. Our  
82 vaccine candidate YF-S0 showed an excellent safety profile in multiple preclinical  
83 models, including in NHP as well as in interferon-deficient mice and hamsters [17].  
84 However, use of such a recombinant YF17D vaccine entails some potential concerns  
85 [19]. Particularly, replication and persistence of YF-S0 in tissues and body fluids poses  
86 a theoretical risk of YF vaccine-associated viscerotropic disease (YEL-AVD) and YF  
87 vaccine-associated neurotropic disease (YEL-AND), which are originally linked to  
88 parental YF17D [20]. Regarding to this, the parental YF17D vaccine are commonly  
89 used as benchmark for direct comparison in safety assessment [19].

90 Here, we investigated the biodistribution and shedding of YF-S0 following vaccination  
91 in hamsters, with as aim to understand (i) to what extent YF-S0 causes viremia  
92 resulting into virus dissemination to vital organs; (ii) to evaluate the risks of YF-S0 for  
93 YEL-AVD/AND by confirming its transient and self-limited replication *in vivo* [17],  
94 restricting the risks for YEL-AVD/AND ; (iii) to what extent viral RNA remains detectable  
95 in body secretions and, in case, (iv) if this poses any environment risks for shedding of  
96 recombinant infectious virus. Furthermore, YFV is also a mosquito-borne virus. To  
97 eliminate the concerns that YF-S0, which employs licensed YF17D as a vector and  
98 hence, despite being proven highly attenuated, might lead to an increased  
99 environmental risk causing by phenotypical change as any other recombinant viruses.  
100 Taking this theoretical consideration into account, we tested the infectivity of YF-S0 on  
101 *Aedes aegypti* (*Ae. aegypti*) mosquitoes to assess its transmission potential. *Ae.*  
102 *aegypti* was selected as target mosquito species because of its well-known high vector  
103 competence for YFV [21]. It is well documented that wild-type YF-Asibi can infect and  
104 disseminate in *Ae. aegypti* while YF17D only occasionally infects the midgut and is  
105 unable to disseminate to secondary organs [22, 23]. Therefore, these two YFV strains  
106 were used as controls to assess transmission of YF-S0 by a competent vector.

107 Finally, we corroborate the favorable safety profile of YF-S0 by reporting limited  
108 dissemination and shedding in vaccinated hamsters, nor any risk of mosquito-borne  
109 transmission.

110

## 111 RESULTS

### 112 Tissue distribution of YF-S0 and parental YF17D in hamsters

113 For our assessment, we chose wild-type (WT) Syrian golden hamsters as preferred  
114 small animal model of YFV infection [24] and injected them with a high dose ( $10^4$  PFU)  
115 of either YF17D (n=6) or YF-S0 (n=6) via intraperitoneal route to achieve maximal  
116 exposure; with primary pharmacodynamics documented before [17] and confirmed  
117 here by consistently high seroconversion rates (at least 80%) to YFV-specific nAb (Fig.  
118 S1). As methods control, we inoculated STAT2-knockout (STAT2<sup>-/-</sup>) hamsters with  $10^4$   
119 PFU of YF17D (n=2). STAT2<sup>-/-</sup> hamsters are deficient in antiviral type I and type III  
120 interferon responses [25] and therefore prone to uncontrolled flavivirus replication [26].  
121 Tissues sampled for analysis were chosen based on biodistribution data available from  
122 non-human primates and humans. In macaques, detection of YF17D RNA has been  
123 reported in lymph nodes, spleen and liver at 7 days post subcutaneous inoculation  
124 [27]. Likewise, viral RNA is widespread and abundantly found in spleen, liver, brain,  
125 kidney, and other organs in patients who developed YEL-AVD [20, 28]. Based on this  
126 knowledge, we collected spleen, liver, brain, and kidney as most common target  
127 organs to assess the risks for YEL-AVD and YEL-AND. Ileum and parotid gland were  
128 collected as additional excretory tissues, and lung as main target of COVID19 (Fig.  
129 1A). From our previous experience [17], we observed that the replication of YF17D or  
130 YF-S0 is transient and well tolerated in WT hamsters. Tissue analysis in hamsters was  
131 thus performed 7 days post inoculation (dpi), *i.e.*, few days after peak of viremia and  
132 at a timepoint which STAT2<sup>-/-</sup> hamsters needed to be euthanized for humane reasons.

133 Viral RNA above detection limits in YF17D vaccinated WT hamsters was mostly limited  
134 to spleen (4/6), with exception of a single hamster in which viral RNA was widespread  
135 to brain, parotid gland, and lung (Fig. 1B and Suppl Table 1). Detection of YF-S0 was  
136 markedly less frequent and restricted to only kidney (2/6) and lung (1/6) (Fig. 1B and  
137 Fig. 1D). Overall, in either group RNA level was low and barely detectable by sensitive  
138 RT-qPCR, indicative for limited replication in WT hamsters. In contrast, unrestricted  
139 replication of virus to high viral loads was observed in STAT2<sup>-/-</sup> hamsters (Fig. 1B and  
140 Fig. 1C). Importantly, no viral RNA nor infectious virus could be detected in brains of  
141 YF-S0 vaccinated hamsters, suggesting a low associated YEL-AND risk (Fig. 1D and  
142 Fig. 1E).

143 Viremia is considered a key indicator for the risk of developing YEL-AVD. Kinetics of  
144 viral RNA in serum as proxy for viremia have been reported earlier for WT hamsters  
145 vaccinated with YF17D or YF-S0 [17] and are discussed here in comparison to  
146 respective data from STAT2<sup>-/-</sup> controls (Fig. 2B). Viremia can be detected consistently  
147 in all YF17D vaccinated WT hamsters (6/6) starting at 1 dpi and lasting for 2.5 (1-4)  
148 days in median (95% confidence interval); by contrast, viral RNA was detected only  
149 once at 3 dpi in a single YF-S0 vaccinated hamster (1/6) (Fig. 2B and Suppl. Table 2).  
150 In STAT2<sup>-/-</sup> hamsters, YF17D grew unrestrictedly to markedly increased viral RNA  
151 levels (Fig. 2B), readily detectable by virus isolation (Fig. S2). Integration of data over  
152 the course of immunization (area under the curve, AUC) indicated a significant reduced  
153 overall serum virus load in YF-S0 vaccinated animals (Fig. 2F).

154

#### 155 **Limited shedding of YF-S0 and parental YF17D RNA**

156 Since shedding of viral RNA in urine after YF17D vaccination has been reported [29],  
157 we sampled different body fluids to investigate respective virus levels (Fig. 2A). Within  
158 all longitudinally sampled specimens, viral RNA was detected only sporadically in urine  
159 (1/56; 3/58), faeces (2/65; 1/66), and buccal swabs (1/66; 3/66) of both YF17D and  
160 YF-S0 vaccinated hamsters, mostly at very low copy numbers, and not linked to  
161 viremia (Figure 2C-2E, Fig. S3, and Suppl Table 3-5). Noteworthy, viral RNA could  
162 only be detected, if at all, only within the first 11 dpi, clearly indicating that viral  
163 replication was self-limiting, leading to the final elimination of the live viral vector from  
164 all tissues. Also, there was no significant difference regarding the AUC between both  
165 groups (Fig. 2G-2I). The potential risk of YF-S0 to be spread by excrements of  
166 vaccinated individuals should hence be as low as for YF17D. In addition, no viable  
167 virus could be isolated from urine samples with RNA counts as high as 10<sup>8</sup> copies/mL  
168 (not shown), in line with no clinical evidence for secondary spread in urine, matching  
169 longstanding field experience for YF17D.

#### 170 **Abortive infection of YF-S0 on yellow fever virus competent vector *Ae. aegypti***

171 YF-S0 is derived from mosquito-borne YFV, and human-to-human transmission by a  
172 competent mosquito vector could theoretically lead to unintentional exposure to the  
173 vaccine, including in immune-compromised people [30]. Thus, the transmission risk of

174 YF-S0 should be excluded regarding main indicators of mosquito vector competence  
175 [21, 31, 32] (Fig. 3A): (i) sufficient virus ingestion from infectious blood meal; (ii)  
176 productive infection of virus in mosquito midgut (midgut infection barrier, MIB); and,  
177 (iii) virus escapes from midgut barrier (MEB), *i.e.*, dissemination to parenteral tissues  
178 to establish sufficiently high virus loads in salivary glands to enable transmission. To  
179 this end, *Aedes aegypti* mosquitoes, as the species of YFV competent vector [21],  
180 were given infectious blood meals with either no virus, YF17D, YF-S0 or wild-type YF-  
181 Asibi strain as positive control [22, 23]. Infection was determined by RT-qPCR and  
182 virus isolation on day 0 on whole mosquitoes (ingestion step), on day 14 in thorax and  
183 abdomen (virus infection and replication in mosquito midgut; marked as main body),  
184 and on day 14 dissemination in head, legs and wings (dissemination).

185 Experimental feeding was equally efficient for all three virus groups regarding both viral  
186 RNA and infectious virus recovered (Fig. 3B&C). However, 14 days after feeding, viral  
187 RNA was detected exclusively in specimens from the YF17D group (8/15) and YF-  
188 Asibi group (8/23); yet none from the YF-S0 group. Importantly, infectious viral particles  
189 were only detectable in the YF-Asibi group, with virus loads as high as about  $10^6$   
190 TCID<sub>50</sub>/body on average (Fig. 3C). For dissemination beyond the MEB, the remaining  
191 head, legs and wings of each six virus-positive mosquitoes with highest body virus  
192 loads from the YF17D and YF-Asibi groups, respectively, and six randomly chosen  
193 specimens from the YF-S0 group were evaluated. All these specimens from the YF-  
194 Asibi group (6/6) scored positive for dissemination, while none from the YF-S0 or  
195 YF17D groups (Fig. 3B-C). The results showing that YF-S0 is neither able to pass the  
196 MIB for midgut infection, nor to escape from the midgut (MEB) for dissemination (Fig.  
197 3D&E).

198



## 199 DISCUSSION

200 The live-attenuated YF17D vaccine is considered as one of the most powerful and  
201 successful vaccines and has been used on humans for decades [33]. Its well-known  
202 characteristics of stimulating both vigorous humoral and cellular immune responses,  
203 as well as favorable innate responses is of interest for other vaccine targets using the  
204 YF17D genome as a backbone [16]. We recently generated a particularly potent  
205 YF17D-vectored vaccine candidate, YF-S0, against SARS-CoV-2 infection, inserting  
206 the non-cleavable spike protein of SARS-CoV-2 (S0) between the E and NS1 region  
207 of YF17D [17]. This construct serves as antigens to induce vigorous immune  
208 responses against both SARS-CoV-2 and YFV infections [17].

209  
210 Apart from YF-S0, YF17D is currently the only fully replication competent viral vector  
211 that is part of any licensed recombinant live viral vaccine in wide use for human  
212 medicine; *i.e.* in the two licensed human vaccines, JE-CV (against Japanese  
213 encephalitis; Imojev® [34]) and CYD-TDV (against all four serotypes of dengue virus;  
214 Dengvaxia® [35]). Additional YF17D-based vaccine candidates are in different stages  
215 of (pre)clinical developed, including vaccines against other flaviviruses (West Nile  
216 virus: ChimeriVax-WN02 [36]; Zika virus: YF-ZIKprM/E [37]) or non-flaviviruses (HIV:  
217 rYF17D/SIVGag45–269 [38]; Lassa virus: YFV17D/LASVGPC [39]; chronic hepatitis  
218 B virus: YF17D/HBc-C [40]). As these YF17D-vectored vaccines has been proved, YF-  
219 S0 also trigger vigorous protective immune responses, including high levels of SARS-  
220 CoV-2 neutralizing antibodies after a single dose vaccination in hamsters, mice and  
221 cynomolgus macaques. However, despite little (pre)clinical evidence nor such reports  
222 from post-marketing surveillance, all these YF17D-vectored vaccines share the  
223 theoretical concerns of the SAEs associated with the parental YF17D vaccines, such  
224 as YEL-AVD (0.4 per 100,000) and YEL-AND (0.8 per 100,000) [19, 20, 41, 42].

225  
226 To temper the remaining safety concerns, the viscerotropism and neurovirulence of  
227 YF-S0 was compared head-to-head with parental YF17D virus by investigating the  
228 biodistribution and viremia following administration of either vaccine virus in hamsters.  
229 We demonstrate that parental YF17D can spread systemically and viral RNA can be  
230 detected in spleen, brain, parotid gland, and lung in YF17D vaccinated WT hamsters.  
231 However, replication of YF17D remains restricted, resulting in infectious virus loads

232 below detection limits. Compared to YF17D, detection of YF-S0 was further limited,  
233 with minute amounts of viral RNA in kidney and lung. Unrestricted virus replication to  
234 high viral loads as cause of viscerotropic or neurotropic disease was observed only in  
235 STAT2<sup>-/-</sup> hamsters, in line with the essential role innate interferon signaling plays in  
236 live vaccines [30, 43] and control of viral infections in general [44]. In addition, in YF-  
237 S0 vaccinated WT hamsters, detection of viremia was rare (Fig. 2B) and importantly,  
238 less frequent (1/6) and markedly lower in magnitude (AUC) and duration (1 day)  
239 compared to parental YF17D (6/6 for >2 days). Taken together, the overall limited  
240 tissue distribution of YF-S0 as well as the low abundance of its RNA in blood, below  
241 detection limits for infectious virus, suggest a further lowered risk of YEL-AVD/AND for  
242 YF-S0 than that reported parental YF17D. To further investigate the potential  
243 environment risk associated with shedding of recombinant virus, we collected urine,  
244 faeces and buccal swabs from vaccinated hamsters and checked for the presence of  
245 viral RNA for 29 days to determine how long YF-S0 would remain detectable in body  
246 secretions as compared to YF17D. No significant differences in vaccine RNA shedding  
247 were observed between YF17D and YF-S0 during the course of immunization (Fig.  
248 2G-2I, AUC). Importantly, no infectious virus could be isolated, suggesting the risk is  
249 very low, even if any inadvertent exposure by vaccinated individuals to their  
250 environment. In summary, these results obtained in a hamster model of YF17D  
251 vaccination clearly demonstrate that (i) the overall viral tissue burden for YF-S0 was  
252 considerably lower than for parental YF17D, and (ii) presence of viral RNA in body  
253 secretions (urine, feces, and buccal swab) was equally low as for YF17D, mostly likely  
254 void of residual infectious virus particles. YF-S0 vaccine virus infection is transient and  
255 harbors minimal, if at all any, risk of shedding nor evidence for environmental biosafety  
256 concern.

257

258 Last, though the chances of YF17D-vectored vaccines to be transmitted by arthropod  
259 vectors are minimal, we evaluated the replication competence of YF-S0 in yellow fever  
260 mosquito vector (i.e., *Ae. aegypti*). While parental YF17D passed the MIB and got  
261 restricted at the MEB as previous documented [22, 23], YF-S0 was already blocked at  
262 the first barrier with no remaining viral RNA or infectious virus detectable after an  
263 infectious bloodmeal. Hence, the transmissibility of YF-S0 by mosquitoes is to be  
264 considered neglectable.

265 Altogether, YF-S0 is considered a safe and efficacious vaccine candidate for the  
266 prevention of COVID19. A similar improved safety as compared to parental YF17D can  
267 be expected for other vaccines following the same design principle, *i.e.*, using  
268 transgenic, yet fully replication-competent YF17D as vector [16, 40].

269

270

271

272 **Funding**

273

274 This project has received funding from the European Union's Horizon 2020 Research  
275 and Innovation Program under grant agreement no. 733176 (RABYD-VAX to K.D. and  
276 J.N.), and no. 101003627 (SCORE to J.N.). Funding was further provided by the  
277 Research Foundation Flanders (FWO) under the Excellence of Science (EOS)  
278 program (no. 30981113, VirEOS to K.D and J.N.), the FWO COVID19 call (no.  
279 G0G4820N), and by the KU Leuven/UZ Leuven COVID-19 Fund (COVAX-PREC  
280 project). L.H.L. acknowledges support by a PhD scholarship grant from the KU Leuven  
281 Special Research Fund (DBOF/14/062). L.L. is member of the Institute of Tropical  
282 Medicine's Outbreak Research Team which is financially supported by the Department  
283 of Economy, Science and Innovation (EWI) of the Flemish Government. X.Z. was  
284 supported by a PhD scholarship grant from the China Scholarship Council (CSC, no.  
285 201906170033). L.D. received funding from KU Leuven Internal Funds (C22/18/007  
286 and STG/19/008), as well as K.D. (C3/19/057 Lab of Excellence). This publication was  
287 supported by the Infravec2 project, which has received funding from the EU's Horizon  
288 2020 Research and Innovation Program 2020 (grant agreement no. 731060).

289

290 **Contributions**

291 Overall conceptual design: L.-H.L., L.L., D.T., and K.D.; methodology: L.-H.L., L.L.,  
292 L.W.; in vivo experiments (hamsters): L.L. and M.L.; in vivo experiments (mosquitoes):  
293 L.W. and A.L.R.R.; in vitro experiments: L.-H.L. and X.Z.; in vitro experiment  
294 (serology): H.J.T.; design and generating of YF-Asibi: M.B.Y. and S.J.; data  
295 management and analysis: L.-H.L. and L.L.; writing of manuscript- draft: L.-H.L.; writing  
296 of manuscript- review and editing: L.-H.L., L.L., L.W., L.D., D.T., and K.D.; supervision:  
297 J.N. and K.D.; funding acquisition: J.N. and K.D.

298 **Acknowledgements**

299 We thank Thibault Francken, Dagmar Buyst, Niels Cremers, Birgit Voeten, and Jasper  
300 Rymenants for their technical support on specimens' preparation and virus titration as  
301 well as Jasmine Paulissen for her technical assistance on generating serology data.

302 **Data availability**

303 All data supporting the findings in this study are available from the corresponding  
304 author upon request.

305 **Competing interests**

306 The authors declare that there are no competing interests. This manuscript is  
307 currently under peer review.

308

309

## 310 **Materials and Methods**

### 311 **Animal experiment**

#### 312 **Hamsters**

313 Wild-type (WT) outbred specific pathogen-free Syrian hamsters (*Mesocricetus*  
314 *auratus*) were purchased from Janvier Laboratories, France. The generation [45] and  
315 characterization [25] of STAT2<sup>-/-</sup> (gene identifier: 101830537) hamsters has been  
316 described elsewhere. STAT2<sup>-/-</sup> hamsters were bred in-house. Hamsters (max. n=2)  
317 were housed in individually ventilated cages (Sealsafe Plus, Tecniplast; cage type  
318 GR900), under standard conditions of 21 °C, 55% humidity and 12:12 light:dark cycles.  
319 Hamsters were provided with food and water ad libitum, as well as extra bedding  
320 material and wooden gnawing blocks for enrichment as previously described. This  
321 project was approved by the KU Leuven ethical committee (P015-2020), following  
322 institutional guidelines approved by the Federation of European Laboratory Animal  
323 Science Associations (FELASA). Hamsters were euthanized by intraperitoneal  
324 administration of 500 µL (hamsters) Dolethal (200 mg/mL sodium pentobarbital,  
325 Vétoquinol SA).

#### 326 **Vaccine and virus stocks**

327 Vaccine viruses used throughout this study have been described [17]. YF-S0 was  
328 derived from a cDNA clone of YF17D (GenBank: X03700) with an in-frame insertion of  
329 a non-cleavable version of the SARS-CoV-2 S protein (GenBank: MN908947.3) in the  
330 YFV E/NS1 intergenic region. YF-S0 vaccine stocks were grown on baby hamster  
331 kidney (BHK21) cells. The molecular and antigenic structure and replication of YF-S0  
332 has been described in detail [17]. Original YF17D vaccine (Stamaril, Sanofi-Pasteur;  
333 lot number G5400) was purchased via the pharmacy of the University Hospital Leuven  
334 and passaged twice in Vero E6 cells prior to use. The construction and rescue of YF-  
335 Asibi from an infectious cDNA clone will be described elsewhere (Yakass, Jansen et  
336 al.). The respective YFV cDNA sequence was adjusted to match previously described  
337 molecular clone Ap7M [46]. All virus stocks were titrated by plaque assay on BHK21  
338 cells [17].

#### 339 **Biodistribution**

340 WT hamsters (6-8 weeks old, female) were inoculated intraperitoneally with  $10^4$   
341 PFU/mL dose of YF17D (n = 6) or YF-S0 (n = 6). STAT2<sup>-/-</sup> hamster (6-8 weeks old,  
342 female) were inoculated intraperitoneally with  $10^4$  PFU/mL of YF17D (n = 2). At 7 dpi,  
343 blood, spleen, liver, brain, kidney, ileum, parotid gland, and lung were collected.

#### 344 **Shedding**

345 WT hamsters (6-8 weeks old, female) were inoculated intraperitoneally with  $10^4$   
346 PFU/mL of YF17D (n = 6) or YF-S0 (n = 6). STAT2<sup>-/-</sup> hamsters (6-8 weeks old, male)  
347 were inoculated intraperitoneally with  $10^4$  PFU/mL of YF17D (n = 3). Blood, urine,  
348 faces, and buccal swab were collected daily for the first 5 dpi, then every other day  
349 until 11 dpi and 15, 22 (except for the blood) and 29 dpi, and afterwards once a week  
350 until 29 dpi.

#### 351 **Mosquito experiment**

##### 352 **Mosquito strain**

353 *Ae. aegypti* Paea [47] were obtained via the Infravec2 consortium  
354 ([https://infravec2.eu/product/live-eggs-or-adult-females-of-aedes-aegypti-strain-paea-](https://infravec2.eu/product/live-eggs-or-adult-females-of-aedes-aegypti-strain-paea-2/)  
355 *2/*) from Institute Pasteur of Paris. Mosquitoes were maintained at the insectary of  
356 Rega Institute, and the fourth generation was used for this study. In brief, larvae were  
357 fed with yeast tablets (Gayelord Hauser, France) until the pupae stage prior to transfer  
358 to cages for emergence. Adults were maintained with cotton soaked in 10% sucrose  
359 solution under standard conditions (28°C, 80% relative humidity, and 14h:10h  
360 light/dark cycle).

##### 361 **Oral infection and sample collection**

362 7-day-old female mosquitoes were starved 24 h prior to infection. Infectious blood  
363 meals contained rabbit erythrocytes plus 5 mM adenosine triphosphate as  
364 phagostimulant, supplemented with virus stocks to final titers of  $2 \times 10^5$  PFU/mL for both  
365 YF17D and YF-S0, and  $5 \times 10^6$  PFU/mL for YF-Asibi, respectively. After 45 minutes, 5  
366 full engorged females from each group were frozen for viral input assessment  
367 (ingestion check, Fig. 3A), and the rest kept with 10% of sugar solution under both  
368 controlled conditions (28 ± 1°C, relative humidity of 80%, light/dark cycle of 14h/10h,  
369 supplied with 10% sucrose solution) and BSL-3 containment conditions. At 14 dpi,

370 mosquitoes were dissected into two parts; main body (thorax and abdomen) and  
371 remainder, collected individually in tubes containing PBS and 2.8 mm ceramic beads  
372 (Prcellys). The samples were homogenized and pass through 0.8µm column filters  
373 (Sartorius, Germany). Thus, cleared supernatants were used for TCID<sub>50</sub> assay or keep  
374 at -80°C for RNA extraction and subsequent RT-qPCR analysis.

### 375 **RNA extractions**

376 Solid tissues (organs), faeces and buccal swabs were homogenized in a bead mill  
377 (Prcellys) in lysis buffer (Macherey-Nagel; cat no. 740984.10). After homogenization,  
378 samples were centrifuged at 10,000 rpm for 5 min to remove cell debris, and total RNA  
379 was extracted by using NucleoSpin Plus RNA virus Kit (Macherey-Nagel, cat no.  
380 740984.10). For serum (50 µl), urine (50 µl) and homogenates of mosquito samples  
381 (150 µl), NucleoSpin RNA virus kit (Macherey-Nagel; cat no. 740956.250) was used  
382 for RNA extraction.

### 383 **RT-qPCR**

384 RT-qPCR for YFV detection was performed as previously described [17] using primers  
385 and probe targeting the YFV NS3 gene [23] on an ABI 7500 Fast Real-Time PCR  
386 System (Applied Biosystems). Absolute quantification was based on standard curves  
387 generated from 5-fold serial dilutions of YF17D cDNA with a known concentration.

### 388 **TCID<sub>50</sub> assay**

389 For virus isolation and quantification BHK21 cells were infected with 10-fold serial  
390 dilutions in 96-well plates, and incubated at 37°C for 6 days using DMEM with 2% fetal  
391 bovine serum (Hyclone), 2 mM L-glutamine (Gibco), 1% sodium bicarbonate (Gibco),  
392 and 1% antibiotics (PenStrep) as assay medium. Solid tissues were homogenized in  
393 a bead mill (Prcellys) in assay medium, and centrifuged at 10,000 rpm for 5 min (4°C)  
394 to remove debris. Resulting viral titers were calculated by the Reed and Muench  
395 method.

### 396 **Serum neutralization test (SNT)**

397 Titers of YFV-specific neutralizing antibodies were determined using BHK21 cells and  
398 a mCherry-tagged variant of YF17D virus (YFV-mCherry) as described [17]. In brief,



399 YFV-mCherry was mixed and incubated with serial diluted of sera for 1 h at 37°C, and  
400 subsequently transferred to BHK21 cells grown in 96-well plates for infection. At 3 days  
401 post infection, the relative infection rate was quantified by counting mCherry-  
402 expressing cells versus total cells on a high content screening platform (CX5, Thermo  
403 Fischer Scientific), normalizing the infection rate of untreated virus controls as 100%.  
404 Half-maximal serum neutralizing titers (SNT<sub>50</sub>) were determined by curve fitting in  
405 GraphPad Prism 8.

#### 406 **Statistics**

407 Data were analyzed using GraphPad Prism 8. Results are represented as individual  
408 values and median for summary statistics. Statistical significance was determined  
409 using non-parametric Mann–Whitney U-test (\*P ≤ 0.05; \*\*P ≤ 0.01; ns, not significant)

410

411

## 412 References

- 413 1. Dallmeier, K., G. Meyfroidt, and J. Neyts, COVID-19 and the intensive care unit:  
414 vaccines to the rescue. *Intensive Care Medicine*, 2021: p. 1-4.
- 415 2. Heinz, F.X. and K. Stiasny, Distinguishing features of current COVID-19  
416 vaccines: knowns and unknowns of antigen presentation and modes of action.  
417 *npj Vaccines*, 2021. 6(1): p. 1-13.
- 418 3. Verbeke, R., et al., The dawn of mRNA vaccines: The COVID-19 case. *Journal*  
419 *of Controlled Release*, 2021. 333: p. 511-520.
- 420 4. Neukirch, L., et al., The potential of adenoviral vaccine vectors with altered  
421 antigen presentation capabilities. *Expert review of vaccines*, 2020. 19(1): p. 25-  
422 41.
- 423 5. Anderson, R.M., et al., Challenges in creating herd immunity to SARS-CoV-2  
424 infection by mass vaccination. *The Lancet*, 2020. 396(10263): p. 1614-1616.
- 425 6. Garcia-Beltran, W.F., et al., Multiple SARS-CoV-2 variants escape  
426 neutralization by vaccine-induced humoral immunity. *Cell*, 2021. 184(9): p.  
427 2372-2383. e9.
- 428 7. Cromer, D., et al., Neutralising antibody titres as predictors of protection against  
429 SARS-CoV-2 variants and the impact of boosting: a meta-analysis. *The Lancet*  
430 *Microbe*, 2021.
- 431 8. Cai, C., et al., The efficacy of COVID-19 vaccines against the B. 1.617. 2 (delta)  
432 variant. *Molecular Therapy*, 2021. 29(10): p. 2890-2892.
- 433 9. Lai, C.-C., et al., COVID-19 vaccines: concerns beyond protective efficacy and  
434 safety. *Expert Review of Vaccines*, 2021. 20(8): p. 1013-1025.
- 435 10. Cai, C., et al., A comprehensive analysis of the efficacy and safety of COVID-  
436 19 vaccines. *Molecular Therapy*, 2021. 29(9): p. 2794-2805.
- 437 11. Rosenblum, H.G., et al., Use of COVID-19 vaccines after reports of adverse  
438 events among adult recipients of Janssen (Johnson & Johnson) and mRNA  
439 COVID-19 vaccines (Pfizer-BioNTech and Moderna): update from the Advisory  
440 Committee on Immunization Practices—United States, July 2021. *Morbidity and*  
441 *Mortality Weekly Report*, 2021. 70(32): p. 1094.
- 442 12. Lai, C.-C., et al., COVID-19 vaccines and thrombosis with thrombocytopenia  
443 syndrome. *Expert Review of Vaccines*, 2021. 20(8): p. 1027-1035.
- 444 13. Tobaiqy, M., et al., Thrombotic adverse events reported for Moderna, Pfizer and  
445 Oxford-AstraZeneca COVID-19 vaccines: comparison of occurrence and  
446 clinical outcomes in the EudraVigilance database. *Vaccines*, 2021. 9(11): p.  
447 1326.
- 448 14. Schultz, N.H., et al., Thrombosis and thrombocytopenia after ChAdOx1 nCoV-  
449 19 vaccination. *New England journal of medicine*, 2021. 384(22): p. 2124-2130.
- 450 15. Witberg, G., et al., Myocarditis after Covid-19 vaccination in a large health care  
451 organization. *New England Journal of Medicine*, 2021.
- 452 16. Bonaldo, M.C., P.C. Sequeira, and R. Galler, The yellow fever 17D virus as a  
453 platform for new live attenuated vaccines. *Human vaccines &*  
454 *immunotherapeutics*, 2014. 10(5): p. 1256-1265.
- 455 17. Sanchez-Felipe, L., et al., A single-dose live-attenuated YF17D-vectored  
456 SARS-CoV-2 vaccine candidate. *Nature*, 2021. 590(7845): p. 320-325.
- 457 18. Hansen, C.A. and A.D. Barrett, The Present and Future of Yellow Fever  
458 Vaccines. *Pharmaceuticals*, 2021. 14(9): p. 891.

- 459 19. Monath, T.P., et al., Live virus vaccines based on a yellow fever vaccine  
460 backbone: standardized template with key considerations for a risk/benefit  
461 assessment. *Vaccine*, 2015. 33(1): p. 62-72.
- 462 20. Barrett, A.D. and D.E. Teuwen, Yellow fever vaccine—how does it work and  
463 why do rare cases of serious adverse events take place? *Current opinion in*  
464 *immunology*, 2009. 21(3): p. 308-313.
- 465 21. de Lataillade, L.d.G., et al., Risk of yellow fever virus transmission in the Asia-  
466 Pacific region. *Nature communications*, 2020. 11(1): p. 1-10.
- 467 22. McGee, C.E., et al., Substitution of Wild-Type Yellow Fever Asibi Sequences  
468 for 17D Vaccine Sequences in ChimeriVax—Dengue 4 Does Not Enhance  
469 Infection of *Aedes aegypti* Mosquitoes. *The Journal of infectious diseases*, 2008.  
470 197(5): p. 686-692.
- 471 23. Danet, L., et al., Midgut barriers prevent the replication and dissemination of the  
472 yellow fever vaccine in *Aedes aegypti*. *PLoS neglected tropical diseases*, 2019.  
473 13(8): p. e0007299.
- 474 24. Julander, J.G., Animal models of yellow fever and their application in clinical  
475 research. *Current opinion in virology*, 2016. 18: p. 64-69.
- 476 25. Boudewijns, R., et al., STAT2 signaling restricts viral dissemination but drives  
477 severe pneumonia in SARS-CoV-2 infected hamsters. *Nature communications*,  
478 2020. 11(1): p. 1-10.
- 479 26. Siddharthan, V., et al., Zika virus infection of adult and fetal STAT2 knock-out  
480 hamsters. *Virology*, 2017. 507: p. 89-95.
- 481 27. Monath, T.P., et al., A live, attenuated recombinant West Nile virus vaccine.  
482 *Proceedings of the National Academy of Sciences*, 2006. 103(17): p. 6694-6699.
- 483 28. Quaresma, J.A., et al., Immunity and immune response, pathology and  
484 pathologic changes: progress and challenges in the immunopathology of yellow  
485 fever. *Reviews in medical virology*, 2013. 23(5): p. 305-318.
- 486 29. Domingo, C., et al., Detection of yellow fever 17D genome in urine. *Journal of*  
487 *clinical microbiology*, 2011. 49(2): p. 760-762.
- 488 30. Hernandez, N., et al., Inherited IFNAR1 deficiency in otherwise healthy patients  
489 with adverse reaction to measles and yellow fever live vaccines. *The Journal of*  
490 *experimental medicine*, 2019. 216(9): p. 2057-2070.
- 491 31. Franz, A.W., et al., Tissue barriers to arbovirus infection in mosquitoes. *Viruses*,  
492 2015. 7(7): p. 3741-3767.
- 493 32. Kramer, L.D. and A.T. Ciota, Dissecting vectorial capacity for mosquito-borne  
494 viruses. *Current opinion in virology*, 2015. 15: p. 112-118.
- 495 33. Pulendran, B., Learning immunology from the yellow fever vaccine: innate  
496 immunity to systems vaccinology. *Nature Reviews Immunology*, 2009. 9(10): p.  
497 741-747.
- 498 34. Appaiahgari, M.B. and S. Vрати, Clinical development of IMOJEV®—a  
499 recombinant Japanese encephalitis chimeric vaccine (JE-CV). *Expert opinion*  
500 *on biological therapy*, 2012. 12(9): p. 1251-1263.
- 501 35. Guy, B., et al., A recombinant live attenuated tetravalent vaccine for the  
502 prevention of dengue. *Expert review of vaccines*, 2017. 16(7): p. 671-684.
- 503 36. Biedenbender, R., et al., Phase II, randomized, double-blind, placebo-controlled,  
504 multicenter study to investigate the immunogenicity and safety of a West Nile  
505 virus vaccine in healthy adults. *Journal of Infectious Diseases*, 2011. 203(1): p.  
506 75-84.

- 507 37. Kum, D.B., et al., A chimeric yellow fever-Zika virus vaccine candidate fully  
508 protects against yellow fever virus infection in mice. *Emerging microbes &*  
509 *infections*, 2020. 9(1): p. 520-533.
- 510 38. Bonaldo, M.C., et al., Recombinant yellow fever vaccine virus 17D expressing  
511 simian immunodeficiency virus SIVmac239 gag induces SIV-specific CD8+ T-  
512 cell responses in rhesus macaques. *Journal of virology*, 2010. 84(7): p. 3699-  
513 3706.
- 514 39. Bredenbeek, P.J., et al., A recombinant Yellow Fever 17D vaccine expressing  
515 Lassa virus glycoproteins. *Virology*, 2006. 345(2): p. 299-304.
- 516 40. Boudewijns, R., et al., A novel therapeutic hepatitis B vaccine candidate induces  
517 strong polyfunctional cytotoxic T cell responses in mice. *JHEP Reports*, 2021:  
518 p. 100295.
- 519 41. Monath, T.P., Review of the risks and benefits of yellow fever vaccination  
520 including some new analyses. *Expert review of vaccines*, 2012. 11(4): p. 427-  
521 448.
- 522 42. Lindsey, N.P., et al., Adverse event reports following yellow fever vaccination,  
523 2007–13. *Journal of travel medicine*, 2016. 23(5): p. taw045.
- 524 43. Bastard, P., et al., Auto-antibodies to type I IFNs can underlie adverse reactions  
525 to yellow fever live attenuated vaccine. *Journal of Experimental Medicine*, 2021.  
526 218(4).
- 527 44. Schoggins, J.W., Interferon-stimulated genes: what do they all do? *Annual*  
528 *review of virology*, 2019. 6: p. 567-584.
- 529 45. Fan, Z., et al., Efficient gene targeting in golden Syrian hamsters by the  
530 CRISPR/Cas9 system. *PloS one*, 2014. 9(10): p. e109755.
- 531 46. Klitting, R., et al., Molecular determinants of yellow fever virus pathogenicity in  
532 Syrian golden hamsters: one mutation away from virulence. *Emerging microbes*  
533 *& infections*, 2018. 7(1): p. 1-18.
- 534 47. Vazeille-Falcoz, M., et al., Variation in oral susceptibility to dengue type 2 virus  
535 of populations of *Aedes aegypti* from the islands of Tahiti and Moorea, French  
536 Polynesia. *The American journal of tropical medicine and hygiene*, 1999. 60(2):  
537 p. 292-299.

538

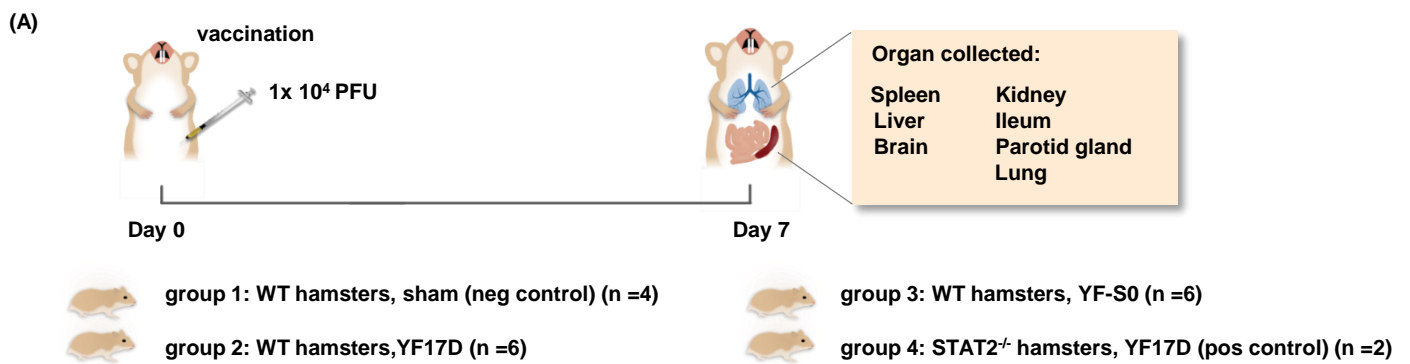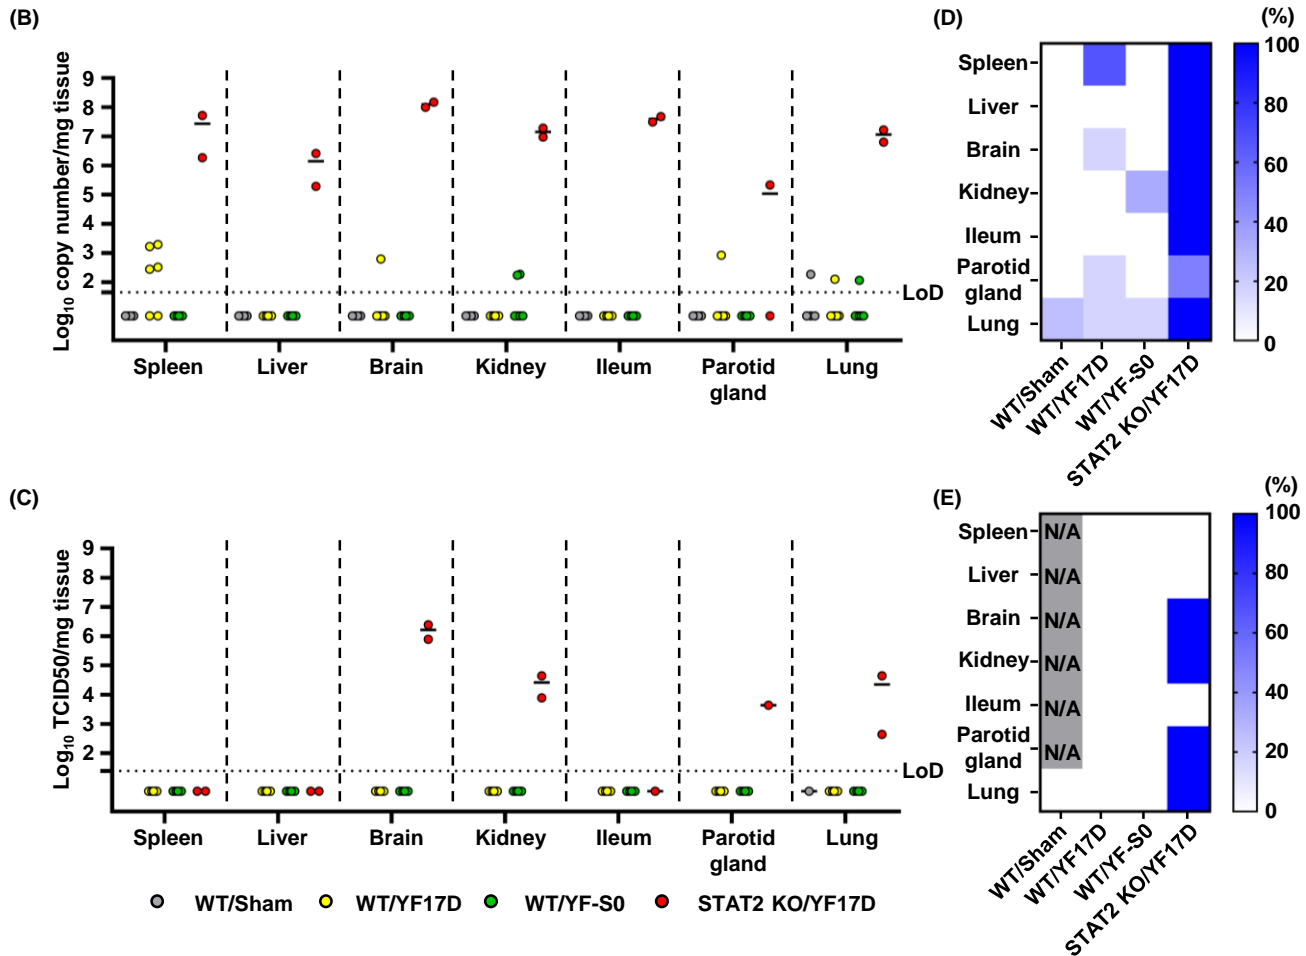

**Fig. 1. Biodistribution of YF-S0 in hamsters.** (A) Schematic of hamster vaccination and organ collection. Hamsters were inoculated i.p. with  $10^4$  pfu/ml of either YF17D or YF-S0 and sacrificed 7 days later. Organs from 4 different experimental groups, including Sham vaccinated wild-type (WT) hamsters and YF17D vaccinated  $STAT2^{-/-}$  knock out (KO) hamsters as respective negative and positive controls, were collected and divided for RNA extraction and virus isolation. (B) Viral RNA load by RT-qPCR. (C) Virus isolation by TCID<sub>50</sub> assay. For Sham and  $STAT2$  KO, only PCR-positive samples were analyzed. (D,E) Heat map representing positivity rates by organ and experimental group based on the results of RT-qPCR (D) or TCID<sub>50</sub> assay (E). Bars in (B) and (C) represent median values. N/A: not applicable

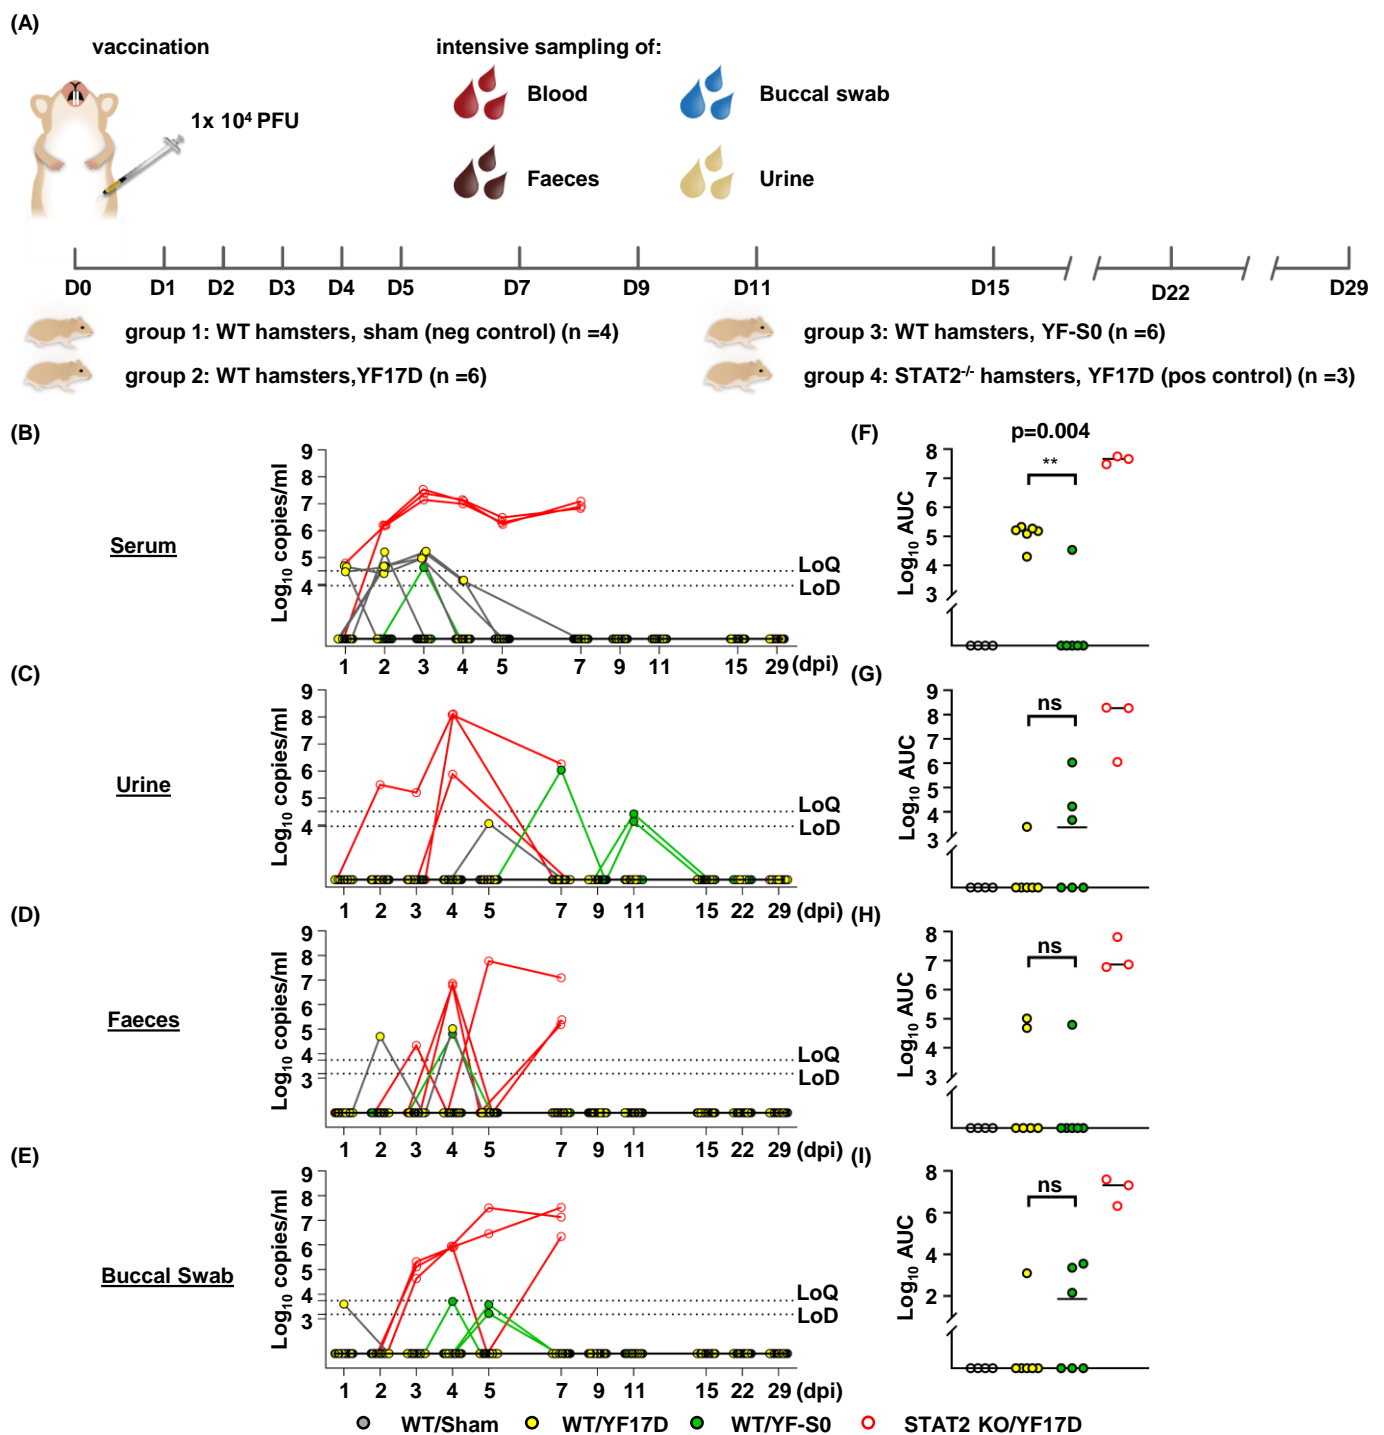

**Fig. 2. Shedding of YF-S0 by vaccinated hamsters.** (A) Schematic of vaccination and specimens' collection. Hamsters were inoculated as in Fig. 1A, and serum, urine, faeces, and buccal swabs serially sampled at indicated timepoints. (B)-(E) Viral RNA load by RT-qPCR. (F)-(I) Area under curve (AUC, copies\*day) calculated by GraphPad Prism 8; Mann-Whitney test was used for the statistic analysis, with  $p > 0.05$  marked as non-significant (ns), and  $p \leq 0.01$  as \*\*. Serum RNA data for YF17D and YF-S0 vaccinated WT hamsters as previously published. LoQ: Limit of quantification; LoD: Limit of detection; dpi: days post inoculation.

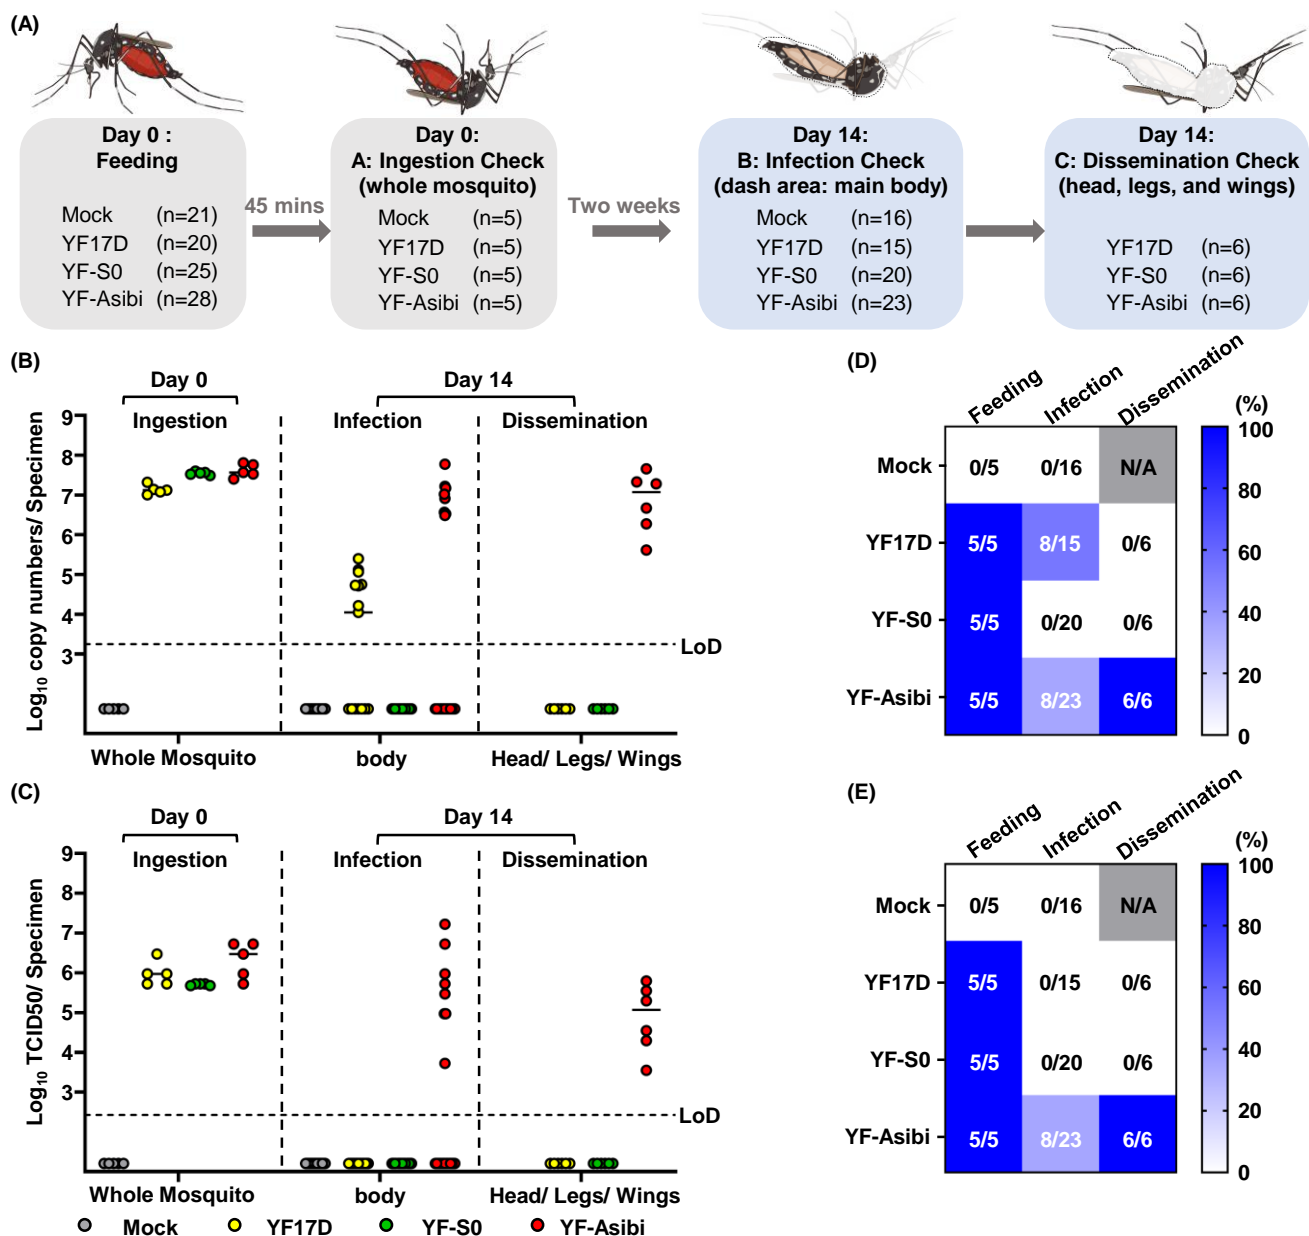

**Fig. 3. Assessment of YF-S0 transmission potential by *Aedes* mosquitoes.** **(A)** Schematic of virus feeding of mosquitoes and specimens' collection. Mosquitoes were fed with infectious blood meal containing YF17D, YF-S0 or YF-Asibi, or Mock. 5 mosquitoes were collected each for ingestion assessment. At 14 days post feeding (dpf), remaining mosquitoes were dissected into two parts, midgut (infection assessment) and head, legs, and wings (dissemination assessment). **(B)** Viral RNA load by RT-qPCR. **(C)** Virus isolation by TCID50 assay. For assessment of ingestion and infection, RT-qPCR and TCID50 were performed on all samples. For assessment of dissemination, only a selection of PCR-positive specimens from the YF17D and YF-Asibi groups (n=6 each) were further analyzed by TCID50 assay, plus 6 randomly chosen from the YF-S0 group. **(D&E)** Heat map representing positivity rates per experiment group as scored by RT-qPCR **(D)** and TCID50 assay **(E)**. Bars in **(B)** and **(C)** represent median values. N/A: not applicable. Mosquito icons were adapted from BioRender.com (2021).

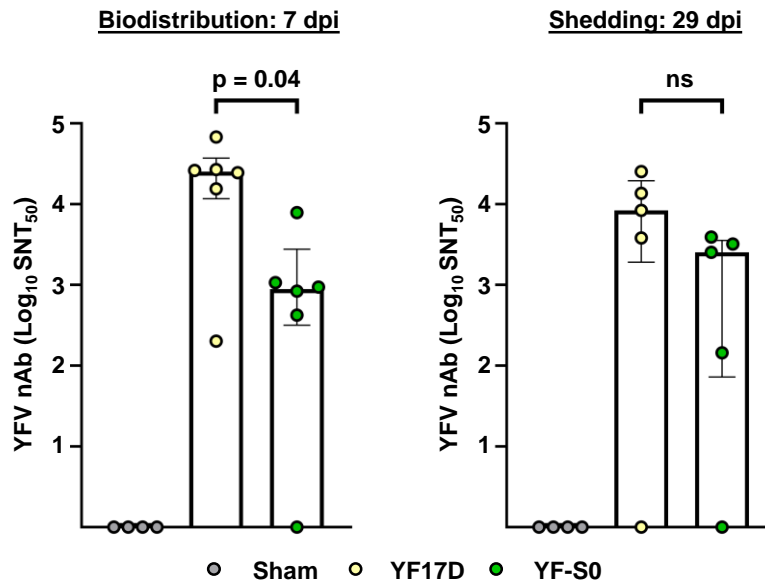

**Fig. S1 (related to Fig. 1A and Fig. 2A). YFV-specific humoral immune responses in one-dose YF17D and YF-S0 vaccinated WT hamsters (primary pharmacodynamics).** Serum samples for determination of YFV-specific neutralizing antibodies (nAb) collected at the respective endpoint of experiments assessing vaccine virus biodistribution (Fig.1A, 7 dpi) and shedding (Fig. 2A, 29 dpi). Sample number in biodistribution experiment: Sham n=4, YF17D n=6, and YF-S0 n=6, and in shedding experiment: Sham n=4, YF17D n=5, and YF-S0 n=5. 50% serum neutralizing titers ( $\text{SNT}_{50}$ ) were presented as median  $\pm$  IQR for each group at logarithmic scale. Mann-Whitney test was used for the statistical analysis, with  $p > 0.05$  marked as non-significant (ns).



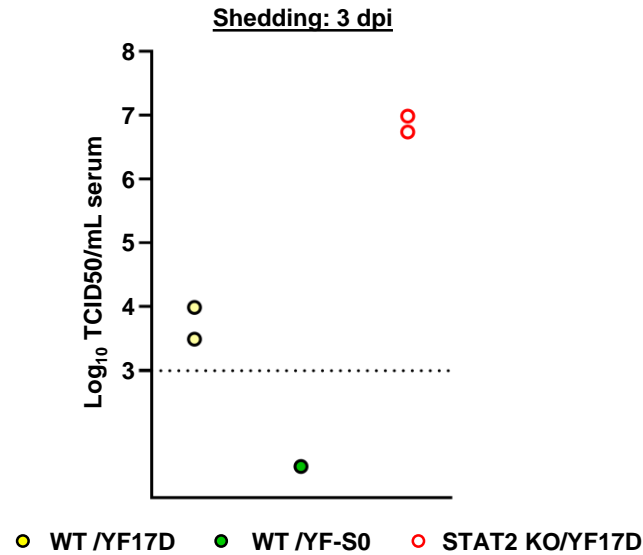

**Fig. S2 (related to Fig. 2A). Infectious virus loads in serum (viremia) in selected YF17D or YF-S0 vaccinated hamsters.** Serum samples collected at 3 days after vaccination. Sample number for YF17D vaccinated WT hamster, n=2; for YF-S0 vaccinated WT hamster, n=1; and (3) YF17D vaccinated STAT2<sup>-/-</sup> hamster, n=2. Selected samples included specimen with respectively highest viral RNA copies numbers detected (YF17D in WT and STAT2<sup>-/-</sup> hamsters) or, in case of YF-S0, the only PCR positive specimen.

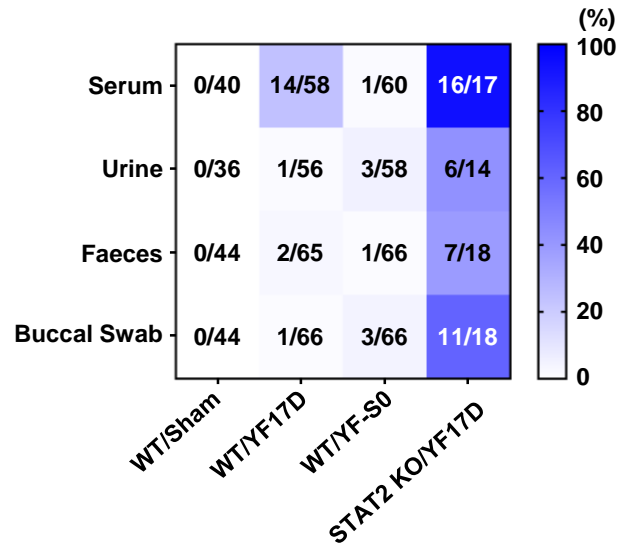

**Fig. S3 (related to Fig. 2A). Cumulative detection rates of viral RNA by RT-qPCR in all specimens (serum, urine, faeces or buccal swab) collected from vaccinated WT or STAT2<sup>-/-</sup> hamster.** Specimens were collected according to sampling scheme depicted in Fig. 2A. Heatmap showing ratios of the total number of all PCR-positive samples versus the total number of all samples tested per study group over the course of 29 days after vaccination.
